# Supplementary material for: Assessing Impacts of Additives on Particulate Matter and Volatile Organic Compounds Produced from the Grilling of Meat
Source: MDPI journal article supplement (doi:10.3390/foods11060833), 2022-03-14
Supplement: s1 [file s1]

## Supplementary data

1. The experimental data moisture content, lipid content and protein content were shown in Table S1. The addition of additives significantly affected the moisture content of meat.

**Table S1.** Comparison of chemical composition of pork belly marinated with various additives

| Chemical composition | Raw pork                | Additive types          |                         |                         |                         |
|----------------------|-------------------------|-------------------------|-------------------------|-------------------------|-------------------------|
|                      |                         | Salt                    | White pepper            | Garlic powder           | Mixed spices            |
| Moisture content     | 71.25±1.31 <sup>a</sup> | 64.57±1.23 <sup>b</sup> | 61.51±0.34 <sup>c</sup> | 68.47±1.82 <sup>a</sup> | 65.74±1.01 <sup>b</sup> |
| Fat content          | 6.84±1.93 <sup>a</sup>  | 5.87±0.85 <sup>b</sup>  | 6.56±1.01 <sup>a</sup>  | 6.83±1.29 <sup>a</sup>  | 6.64±1.83 <sup>a</sup>  |
| Protein content      | 20.21±0.99 <sup>a</sup> | 19.55±1.53 <sup>a</sup> | 19.83±1.17 <sup>a</sup> | 19.01±1.03 <sup>a</sup> | 19.36±0.87 <sup>a</sup> |

2. Figure S1 shows that the average total particulate matter (TPM) mass concentration emitted from the meat-grilling process, and the TPM mass concentration was determined to be 40.47±5.16 mg/m<sup>3</sup> (control group), 21.1±3.52 mg/m<sup>3</sup> (salt), 14.13±4.09 mg/m<sup>3</sup> (white pepper), 27.17±2.97 mg/m<sup>3</sup> (garlic powder), and 17.8±0.95 mg/m<sup>3</sup> (MS), respectively. The meat without any additives marinade generated higher ( $p < 0.05$ ).

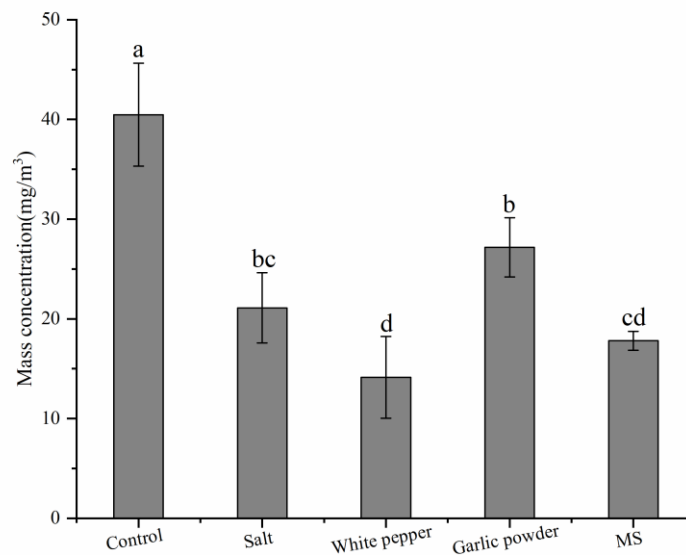

**Figure S1.** Total particulate matter mass concentration produced from the grilling of meat marinated with different additives. Different lowercase letters above each bar means significant differences. Error bar denotes standard deviation.
